# Supplementary material
Source: publisher figshare collection journal article supplement (https://acs.figshare.com/ndownloader/files/5185255)

### Preparation of Hollow Anatase TiO<sub>2</sub> Nanospheres via Ostwald Ripening

Hua Gui Yang and Hua Chun Zeng\*

*Department of Chemical and Environmental Engineering, Faculty of Engineering*

*National University of Singapore, 10 Kent Ridge Crescent, Singapore 119260*

**EDX result:** A representative EDX spectrum of the anatase TiO<sub>2</sub> nanospheres is presented below. Carbon single is generated from carbon tape used in the measurement. Synthetic conditions: 30 mL of TiF<sub>4</sub> solution (1.33 mM) at 180 °C for 10 h. Samples synthesized with an addition of thiourea give essentially the same EDX spectra (not shown); no sulfur is detected.

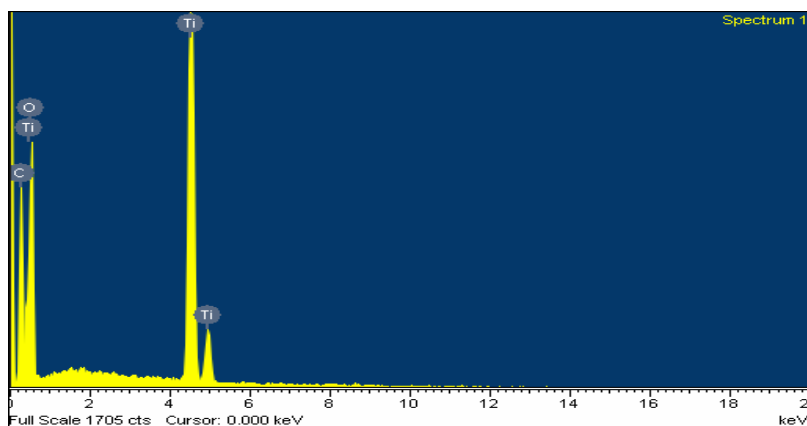

Supplement: Supplementary file 1 [file 5185255]
